# Supplementary material for: Synthesis, crystal structure, and luminescence properties of a new microporous europium silicate: Na3EuSi6O15·1.47H2O
Source: Royal Society of Chemistry journal article supplement (doi:10.1039/c5ra00423c), 2015-01-01
Supplement: c5ra00423c1.pdf [file c5ra00423c1.pdf]

## Electronic Supplementary Information

### Synthesis, crystal structure, and luminescence properties of a new microporous europium silicate:

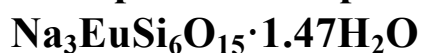

Wei Liu, Ying Ji, Fuyang Liu, Min Yang, Ying Wang, Xudong Zhao\* and Xiaoyang Liu\*

\*To whom correspondence should be addressed.

\*Xiaoyang Liu, Tel: +86-431-85168316. Fax: +86-431-85168316. E-mail:

[liuxy@jlu.edu.cn](mailto:liuxy@jlu.edu.cn)

\*Xudong Zhao, Tel: +86-431-85168601. Fax: +86-431-85168601. E-mail:

[xdzhao@jlu.edu.cn](mailto:xdzhao@jlu.edu.cn)

State Key Laboratory of Inorganic Synthesis and Preparative Chemistry, College of  
Chemistry, Jilin University, 2699 Qianjin Street, Changchun 130012, PR China

# Contents

**Table S1** Atomic coordinates and equivalent isotropic displacement parameters for  $\text{Na}_3\text{EuSi}_6\text{O}_{15}\cdot 1.47\text{H}_2\text{O}$

**Table S2** Selected bond lengths [ $\text{\AA}$ ] and angles [deg] for  $\text{Na}_3\text{EuSi}_6\text{O}_{15}\cdot 1.47\text{H}_2\text{O}$

**Figure S1** EDS spectra of **1**.

**Table S3** EDS analysis data of **1**

**Figure S2** TG analysis result of **1**

Table S1 Atomic coordinates and equivalent isotropic displacement parameters for  $\text{Na}_3\text{EuSi}_6\text{O}_{15}\cdot 1.47\text{H}_2\text{O}$

|        | x          | y         | z           | U(eq)    |
|--------|------------|-----------|-------------|----------|
| Eu(1)  | 0.0000     | 0.3692(1) | 0.6633(1)   | 0.007(1) |
| Si(1)  | 0.2902(4)  | 0.4501(1) | 0.4131(4)   | 0.008(1) |
| Si(2)  | 0.2906(3)  | 0.2985(1) | 0.9508(4)   | 0.008(1) |
| Si(3)  | 0.0000     | 0.4162(1) | 0.1499(9)   | 0.007(1) |
| Si(4)  | 0.0000     | 0.3181(1) | 0.12607(6)  | 0.007(1) |
| Na(1)  | 0.5000     | 0.3748(2) | 0.6810(30)  | 0.031(2) |
| Na(2)  | 0.2585(16) | 0.4618(4) | 0.8731(16)  | 0.033(3) |
| Na(3)  | 0.2166(14) | 0.2367(3) | 0.5278(15)  | 0.026(2) |
| O(1)   | 0.2357(10) | 0.4170(2) | 0.5757(11)  | 0.014(2) |
| O(2)   | 0.2571(15) | 0.5000    | 0.4809(18)  | 0.017(2) |
| O(3)   | 0.1778(10) | 0.4436(2) | 0.2170(10)  | 0.015(2) |
| O(4)   | 0.5000     | 0.4445(3) | 0.3583(17)  | 0.017(2) |
| O(5)   | 0.5000     | 0.2998(3) | 0.10223(15) | 0.012(2) |
| O(6)   | 0.1789(9)  | 0.3026(2) | 0.11461(16) | 0.022(2) |
| O(7)   | 0.2500     | 0.2500    | 0.8602(16)  | 0.016(2) |
| O(8)   | 0.2450(10) | 0.3333(2) | 0.7953(12)  | 0.019(2) |
| O(9)   | 0.0000     | 0.3025(3) | 0.1472(15)  | 0.017(2) |
| O(10)  | 0.0000     | 0.3716(3) | 0.1277(16)  | 0.016(2) |
| O(11)  | 0.0000     | 0.4102(3) | -0.662(15)  | 0.016(2) |
| O(12W) | 0.0000     | 0.5000    | 0.8150(30)  | 0.046(8) |
| O(13W) | 0.0000     | 0.1919(6) | 0.4530(30)  | 0.090(8) |

Table S2 Selected bond lengths [ $\text{\AA}$ ] and angles [deg] for  $\text{Na}_3\text{EuSi}_6\text{O}_{15}\cdot 1.47\text{H}_2\text{O}$ 

| Bond          | Bond length ( $\text{\AA}$ ) | Bond angle            | Values [deg] |
|---------------|------------------------------|-----------------------|--------------|
| Eu(1)-O(11)#5 | 2.295(10)                    | O(11)#5-Eu(1)-O(8)    | 85.6(3)      |
| Eu(1)-O(8)    | 2.313(7)                     | O(8)-Eu(1)-O(8)#1     | 102.6(4)     |
| Eu(1)-O(8)#1  | 2.313(7)                     | O(11)#5-Eu(1)-O(1)#1  | 83.0(2)      |
| Eu(1)-O(1)#1  | 2.357(7)                     | O(8)-Eu(1)-O(1)#1     | 168.1(3)     |
| Eu(1)-O(1)    | 2.357(7)                     | O(8)#1-Eu(1)-O(1)#1   | 80.1(3)      |
| Eu(1)-O(9)#8  | 2.455(10)                    | O(1)#1-Eu(1)-O(1)     | 94.9(4)      |
| Eu(1)-O(10)#8 | 2.738(11)                    | O(11)#5-Eu(1)-O(9)#8  | 156.8(4)     |
| Si(1)-O(1)    | 1.589(8)                     | O(8)-Eu(1)-O(9)#8     | 79.9(2)      |
| Si(1)-O(4)    | 1.603(4)                     | O(1)#1-Eu(1)-O(9)#8   | 112.0(2)     |
| Si(1)-O(2)    | 1.624(5)                     | O(11)#5-Eu(1)-O(10)#8 | 145.1(3)     |
| Si(1)-O(3)    | 1.631(8)                     | O(8)-Eu(1)-O(10)#8    | 114.7(2)     |
| Si(2)-O(5)    | 1.625(4)                     | O(1)#1-Eu(1)-O(10)#8  | 73.7(2)      |
| Si(2)-O(7)    | 1.648(5)                     | O(9)#8-Eu(1)-O(10)#8  | 58.1(3)      |
| Si(2)-O(6)    | 1.616(10)                    | O(11)#5-Eu(1)-Si(4)#8 | 175.5(3)     |
| Si(2)-O(8)    | 1.571(8)                     | O(1)-Si(1)-O(4)       | 110.5(5)     |
| Si(4)-O(6)    | 1.620(8)                     | O(1)-Si(1)-O(2)       | 110.6(5)     |
| Si(4)-O(9)    | 1.574(12)                    | O(4)-Si(1)-O(2)       | 108.5(6)     |
| Si(4)-O(10)   | 1.646(10)                    | O(1)-Si(1)-O(3)       | 114.3(4)     |
| Si(4)-O(6)#1  | 1.620(8)                     | O(4)-Si(1)-O(3)       | 105.7(5)     |
|               |                              | O(2)-Si(1)-O(3)       | 106.9(5)     |
|               |                              | O(8)-Si(2)-O(6)       | 116.0(4)     |
|               |                              | O(8)-Si(2)-O(5)       | 113.9(5)     |
|               |                              | O(6)-Si(2)-O(5)       | 102.3(5)     |
|               |                              | O(8)-Si(2)-O(7)       | 107.6(5)     |
|               |                              | O(6)-Si(2)-O(7)       | 108.2(4)     |
|               |                              | O(11)-Si(3)-O(3)#1    | 110.6(4)     |
|               |                              | O(3)#1-Si(3)-O(3)     | 107.1(6)     |
|               |                              | O(11)-Si(3)-O(10)#8   | 116.5(6)     |
|               |                              | O(3)#1-Si(3)-O(10)#8  | 105.8(4)     |
|               |                              | O(9)-Si(4)-O(6)#1     | 112.8(4)     |
|               |                              | O(6)#1-Si(4)-O(6)     | 108.9(7)     |
|               |                              | O(9)-Si(4)-O(10)      | 103.7(6)     |
|               |                              | O(6)#1-Si(4)-O(10)    | 109.2(3)     |

Symmetry transformations used to generate equivalent atoms:

#1 -x,y,z    #5 x,y,z+1    #8 x,y,z-1

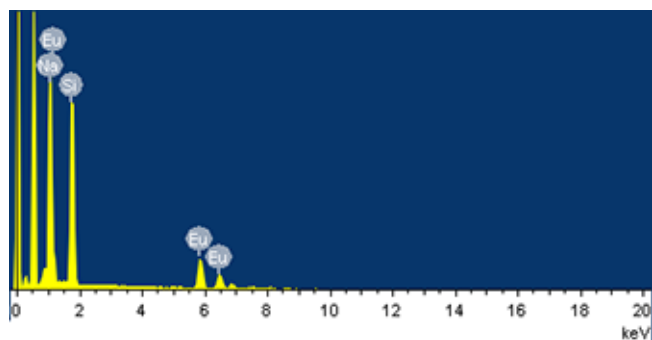

**Figure S1** EDS spectrum of **1**.

**Table S2** EDS analysis data of **1**

|      |     |      |
|------|-----|------|
| Na   | Eu  | Si   |
| 5.01 | 1.0 | 3.99 |

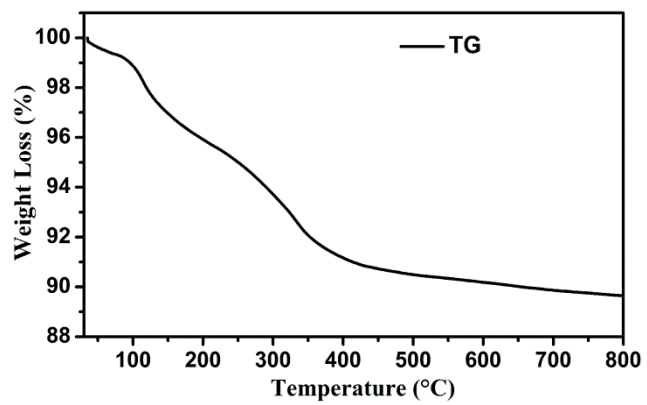

**Figure S2** TG analysis result of **1**.
